# Supplementary material for: RED-ML: a novel, effective RNA editing detection method based on machine learning
Source: PubMed Central journal article supplement (PMC5467039; doi:10.1093/gigascience/gix012), 2017-03-02

# Features Importance

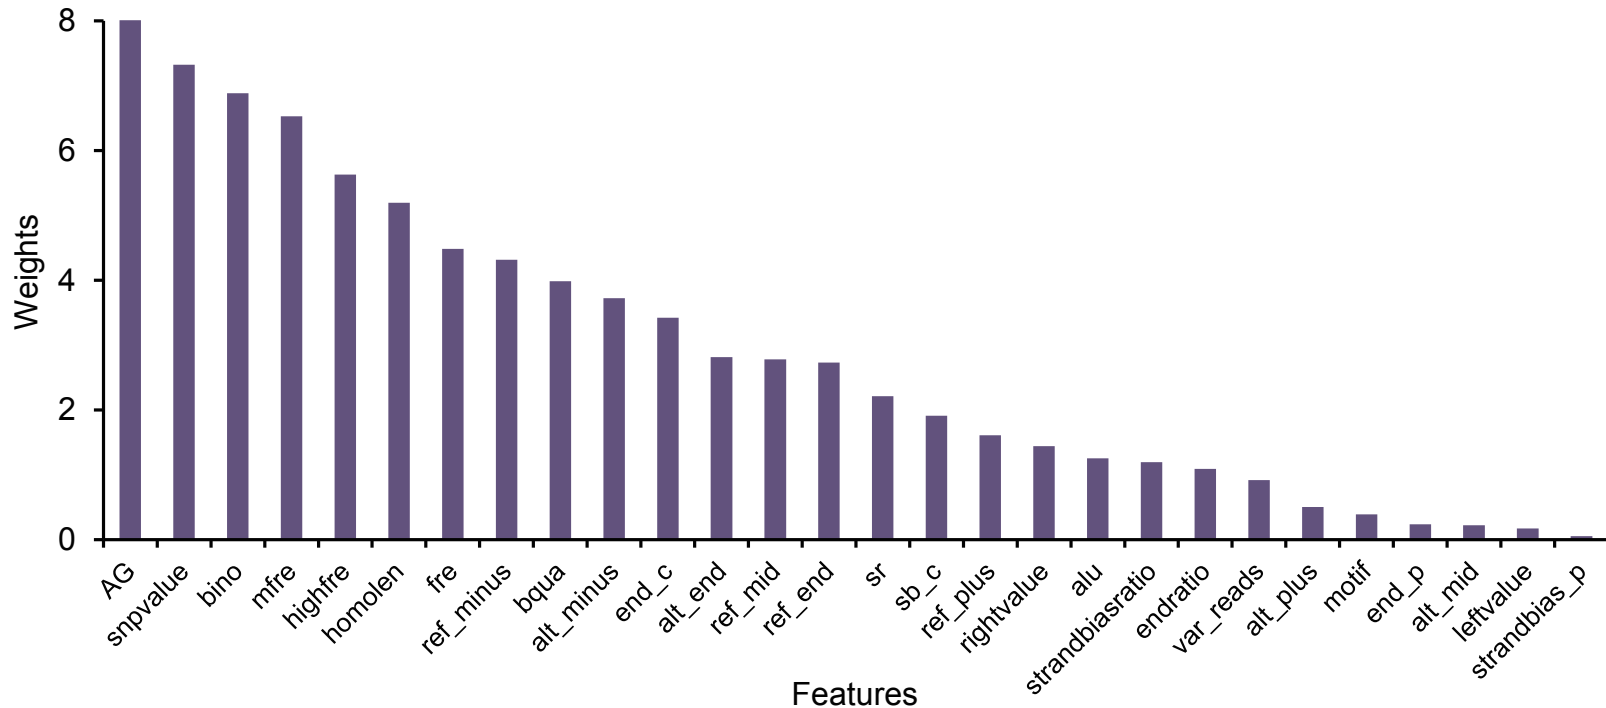

Supplement: gix012_FigureS3.pdf [file gix012_FigureS3.pdf]
